# Supplementary material for: Microarrays, Enzymatic Assays, and MALDI-MS for Determining Specific Alterations to Mitochondrial Electron Transport Chain Activity, ROS Formation, and Lipid Composition in a Monkey Model of Parkinson’s Disease
Source: MDPI journal article supplement (doi:10.3390/ijms24065470), 2023-03-13
Supplement: s1 [file s1]

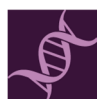

**Table S1.** 50 most significant lipid species in the paired t-test between control and Parkinson's models. The first column (m/z) shows the experimentally detected mass of the assigned lipid species; m/z (teor) is the calculated mass of the lipid species; error (Da) is the error. in Da. between the experimental and calculated mass of the lipid species; error (ppm) shows the error in parts per million; Sig is the significance of the comparison in the test (\*p < 0. 05;\*\*p < 0. 01 and\*\*\*p < 0. 01: \*\*\*).p is the p-value in the test(\*p < 0. 05;\*\*p < 0. 01 and\*\*\*p < 0. 01: \*\*\*), and FC (MPD-MC)/MC is the Fold change between the Parkinson (MPD) and Control (MC) models

| Assigned Lipid Specie         | m/z      | m/z (teor) | Error (Da) | Error (ppm) | Sig | P     | FC (MDP-MC)/(MC) |
|-------------------------------|----------|------------|------------|-------------|-----|-------|------------------|
| [PS 37:2-H]-                  | 800.5456 | 800.5448   | -0.0008    | -0.99       | *** | 0.001 | -54.0%           |
| [PS 38:1-H]-                  | 816.5772 | 816.5761   | -0.0011    | -1.31       | **  | 0.002 | -32.8%           |
| [PS 40:1+Na-2H]-/[PS 42:4-H]- | 866.5927 | 866.5894   | -0.0033    | -3.81       | **  | 0.003 | -22.4%           |
| [PG 43:2-H]-                  | 871.6445 | 871.6434   | -0.0011    | -1.23       | **  | 0.003 | 263.6%           |
| [PG 44:12-H]-                 | 865.5007 | 865.5025   | 0.0019     | 2.15        | **  | 0.004 | -29.2%           |
| [PS 38:2-H]-                  | 814.5613 | 814.5604   | -0.0009    | -1.09       | **  | 0.005 | -28.3%           |
| [PS 36:0+Na-2H]-              | 812.5455 | 812.5424   | -0.0031    | -3.77       | *   | 0.011 | -25.3%           |
| [PS 40:2-H]-                  | 842.5916 | 842.5917   | 0.0001     | 0.13        | *   | 0.011 | -34.4%           |
| [PS 47:3+K-2H]-               | 976.6395 | 976.6415   | 0.0020     | 2.05        | *   | 0.012 | -58.6%           |
| [PA 32:0-H]-                  | 647.4655 | 647.4657   | 0.0003     | 0.39        | *   | 0.013 | 41.9%            |
| [Lyso-PS O-20:0+Na-2H]-       | 560.3362 | 560.3335   | -0.0027    | -4.87       | *   | 0.015 | -44.3%           |
| [PA O-40:7-H]-/[PA P-40:6-H]- | 731.5027 | 731.5021   | -0.0006    | -0.84       | *   | 0.015 | 265.4%           |
| [PS 37:1-H]-                  | 802.5614 | 802.5604   | -0.0010    | -1.21       | *   | 0.015 | -26.0%           |
| [Sulfatide t43:1 -H]-         | 920.6496 | 920.6501   | 0.0005     | 0.55        | *   | 0.015 | 13.4%            |
| [PE O-42:6-H]-/[PE P-42:5-H]- | 804.5919 | 804.5913   | -0.0006    | -0.73       | *   | 0.018 | -20.8%           |
| [Sulfatide t38:1 -H]-         | 850.5721 | 850.5719   | -0.0001    | -0.16       | *   | 0.019 | -16.5%           |
| [PE 32:1-H]-                  | 688.4951 | 688.4923   | -0.0028    | -4.07       | *   | 0.020 | 102.5%           |
| [PS 28:1+Na-2H]-/[PS 30:4-H]- | 698.4048 | 698.4016   | -0.0033    | -4.65       | *   | 0.020 | -79.9%           |
| [PE O-42:5-H]-/[PE P-42:4-H]- | 806.6077 | 806.6069   | -0.0008    | -0.96       | *   | 0.020 | -15.1%           |
| [PG O-34:2-H]-/[PG P-34:1-H]- | 731.5222 | 731.5233   | 0.0010     | 1.41        | *   | 0.022 | 150.3%           |

|                                                      |          |          |         |       |    |       |        |
|------------------------------------------------------|----------|----------|---------|-------|----|-------|--------|
| [PG O-34:3-H]-/[PG P-34:2-H]-                        | 729.5076 | 729.5076 | 0.0000  | -0.01 | *  | 0.023 | 155.8% |
| [PS 38:2+Na-2H]-/[PS 40:5-H]-                        | 836.5441 | 836.5424 | -0.0017 | -2.02 | *  | 0.023 | -29.8% |
| [PA 34:1-H]-                                         | 673.4812 | 673.4814 | 0.0002  | 0.33  | *  | 0.023 | 19.8%  |
| [PS 36:1-H]-                                         | 788.5444 | 788.5448 | 0.0004  | 0.46  | *  | 0.023 | -10.4% |
| [PE O-40:3-H]-/[PE P-40:2-H]-                        | 782.6078 | 782.6069 | -0.0009 | -1.18 | *  | 0.023 | -42.0% |
| [Sulfatide t33:2 -H]-                                | 778.4775 | 778.4780 | 0.0005  | 0.68  | *  | 0.026 | -53.7% |
| [PG O-40:4-H]-/[PG P-40:3-H]-                        | 811.5863 | 811.5859 | -0.0005 | -0.57 | *  | 0.032 | 188.0% |
| [PS O-38:7+K-2H]-/[PS P-38:6+K-2H]-                  | 828.4576 | 828.4588 | 0.0012  | 1.42  | *  | 0.032 | -63.3% |
| [PA 40:3-H]-                                         | 753.5428 | 753.5440 | 0.0012  | 1.55  | *  | 0.033 | -60.6% |
| [PE 32:0-H]-                                         | 690.5085 | 690.5079 | -0.0005 | -0.78 | *  | 0.038 | 72.3%  |
| [CerP d42:1 -H]-                                     | 728.5960 | 728.5963 | 0.0003  | 0.45  | *  | 0.041 | 266.9% |
| [PG O-40:3-H]-/[PG P-40:2-H]-                        | 813.6009 | 813.6015 | 0.0006  | 0.71  | *  | 0.043 | 57.6%  |
| [Sulfatide d43:1 -H]-                                | 904.6534 | 904.6552 | 0.0019  | 2.05  | *  | 0.043 | 14.2%  |
| [PS 29:2-H]-                                         | 688.4195 | 688.4196 | 0.0001  | 0.09  | *  | 0.046 | -75.8% |
| [PI O-30:0-H]-                                       | 767.5049 | 767.5081 | 0.0031  | 4.07  | *  | 0.047 | 24.2%  |
| [PE O-40:6-H]-/[PE P-40:5-H]-                        | 776.5611 | 776.5600 | -0.0011 | -1.41 | *  | 0.049 | -11.7% |
| [PE 44:7-H]-                                         | 844.5867 | 844.5862 | -0.0006 | -0.65 | ns | 0.055 | -57.1% |
| [PA 44:10-H]-                                        | 795.4987 | 795.4970 | -0.0017 | -2.07 | ns | 0.056 | -83.8% |
| [PS 47:2+K-2H]-                                      | 978.6554 | 978.6572 | 0.0018  | 1.86  | ns | 0.056 | -25.1% |
| [PS 48:2+K-2H]-                                      | 992.6723 | 992.6728 | 0.0005  | 0.50  | ns | 0.058 | -34.4% |
| [PE 40:2-H]-                                         | 798.6029 | 798.6018 | -0.0010 | -1.29 | ns | 0.063 | -36.2% |
| [PE 42:5-H]-                                         | 820.5869 | 820.5862 | -0.0007 | -0.85 | ns | 0.071 | -18.7% |
| [PA 44:6-H]-                                         | 803.5644 | 803.5596 | -0.0048 | -5.99 | ns | 0.071 | 104.6% |
| [PE O-40:2-H]-/[PE P-40:1-H]-                        | 784.6225 | 784.6226 | 0.0001  | 0.15  | ns | 0.072 | -51.8% |
| [PI O-38:4-H]-                                       | 871.5713 | 871.5707 | -0.0007 | -0.75 | ns | 0.073 | -38.2% |
| [PS O-31:1+Na-2H]-/[PS P-31:0+Na-2H]-/[PS O-33:4-H]- | 726.4717 | 726.4693 | -0.0024 | -3.34 | ns | 0.075 | -43.8% |
| [Sulfatide t41:1 -H]-                                | 892.6186 | 892.6188 | 0.0002  | 0.24  | ns | 0.075 | 12.1%  |

|                               |          |          |         |       |    |       |        |
|-------------------------------|----------|----------|---------|-------|----|-------|--------|
| [PS O-29:2-H]-                | 674.4440 | 674.4403 | -0.0037 | -5.43 | ns | 0.075 | 37.4%  |
| [PS 34:2+Na-2H]-/[PS 36:5-H]- | 780.4823 | 780.4798 | -0.0025 | -3.19 | ns | 0.078 | -21.1% |

**Table S2.** Changes in relative abundance of [PS 38:1], [PE 40:6], and [PG 46:10]. Results are expressed as percentages of change respect control group (mean ± SEM).

| Tissues          | Lipids  |       |         |      |          |       |
|------------------|---------|-------|---------|------|----------|-------|
|                  | PS 38:1 |       | PE 40:6 |      | PG 46:10 |       |
|                  | MEAN    | SEM   | MEAN    | SEM  | MEAN     | SEM   |
| Caudate nucleus  | 8.00    | 8.00  | 9.27    | 4.18 | 40.91    | 12.04 |
| Cerebellum       | 342.66  | 4.41  | -30.86  | 3.00 | 144.15   | 28.24 |
| Corpus Callosum  | 57.66   | 3.71  | -3.48   | 2.98 | 44.58    | 1.90  |
| Globus Pallidus  | 44.33   | 5.78  | 29.27   | 0.64 | -20.71   | 5.23  |
| Hypothalamus     | 120.33  | 9.60  | 15.71   | 4.19 | -25.52   | 8.05  |
| Hippocampus      | 68.66   | 2.60  | -16.72  | 4.17 | -36.47   | 11.78 |
| Mesencephalon    | 74.66   | 10.17 | 5.75    | 6.88 | -27.73   | 3.21  |
| Putamen          | 34.66   | 5.36  | 36.19   | 4.78 | 3.09     | 38.76 |
| Substantia nigra | 51.00   | 7.63  | 54.61   | 6.81 | 7.08     | 17.08 |
| Thalamus         | 35.00   | 18.02 | 10.20   | 2.61 | -22.23   | 3.78  |
